# Supplementary material
Source: PubMed Central journal article supplement (PMC5528574)
Supplement: MOL2-8-1208-s001.pdf [file MOL2-8-1208-s001.pdf]

**Supplementary file**

**Supplementary Fig. 1.** Pathway analysis suggests that dysregulations of the miRNA signatures are involved in NSCLC pathway.

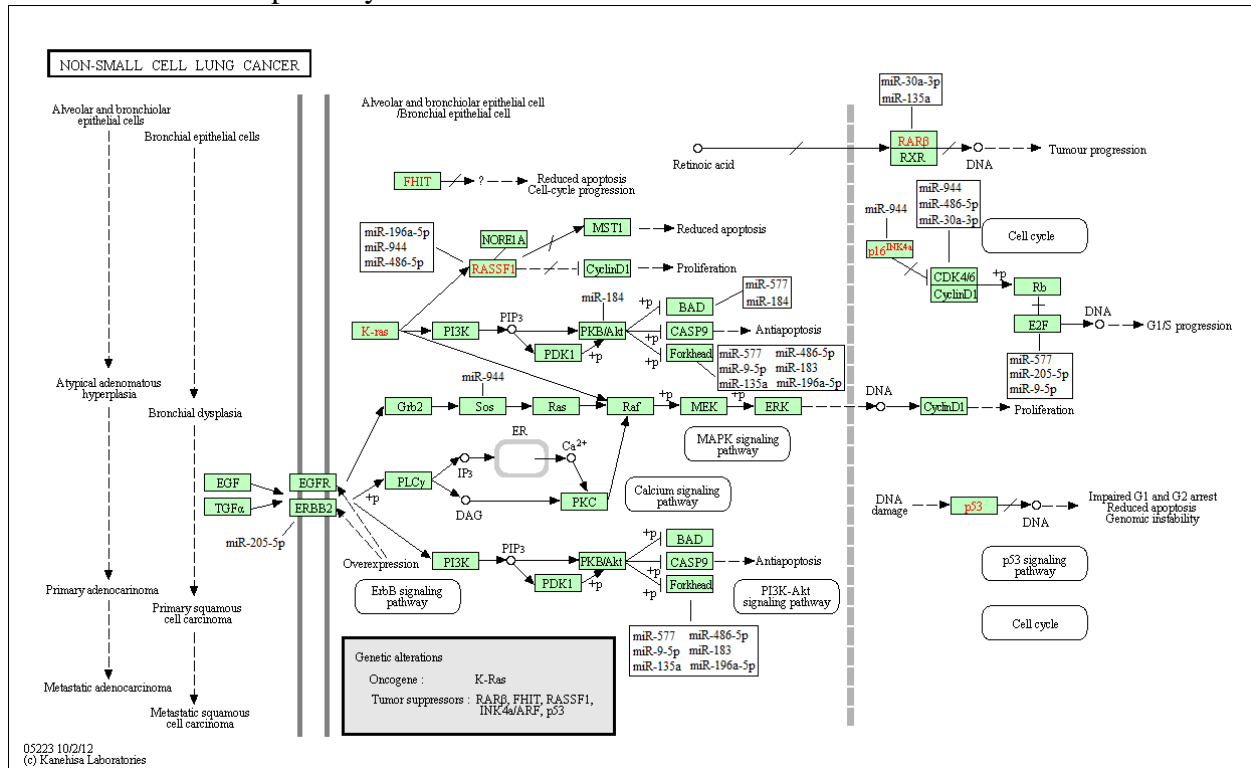

**Supplementary Fig. 2.** Downregulation of miR-944 inhibits NSCLC cell growth, proliferation, migration, and invasion.

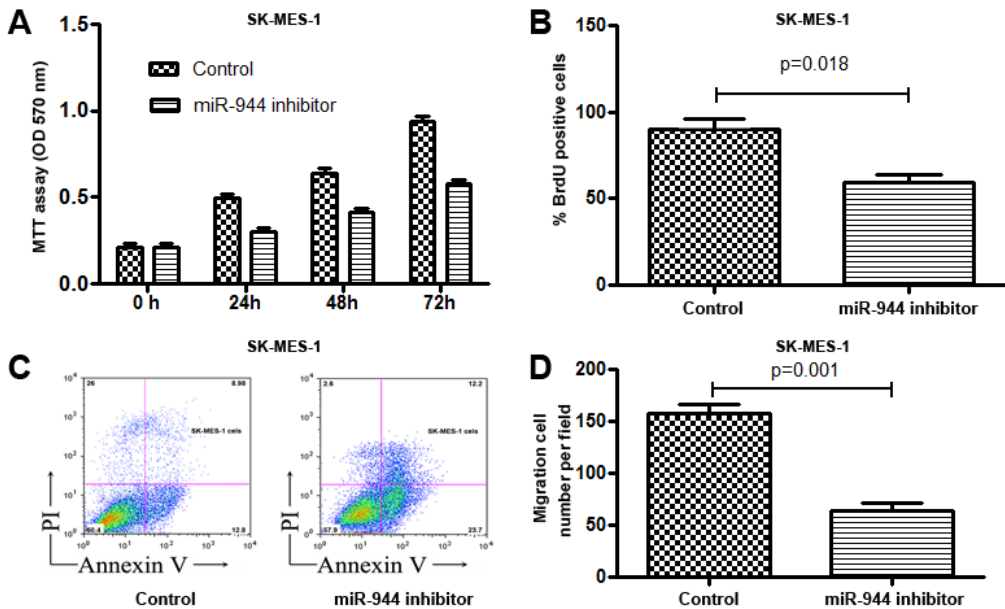

A, reduced expression of miR-944 in SK-MES-1 cells decreased cell growth. B, reduced expression of miR-944 diminished cell proliferation of NSCLC. C, reduced expression of miR-944 in SK-MES-1 cells increased apoptosis. D, reduced expression of miR-944 in SK-MES-1 cells decreased cell invasion and migration. All data were obtained from three independent experiments and shown as mean ± SD. The experiments were performed in two cell lines, SK-MES-1 and H292, and generated similar data. The figure only showed the results from SK-MES-1.

**Supplementary Fig. 3.** SOCS4 is involved in miR-944-induced suppression of cell migration and invasion of NSCLC.

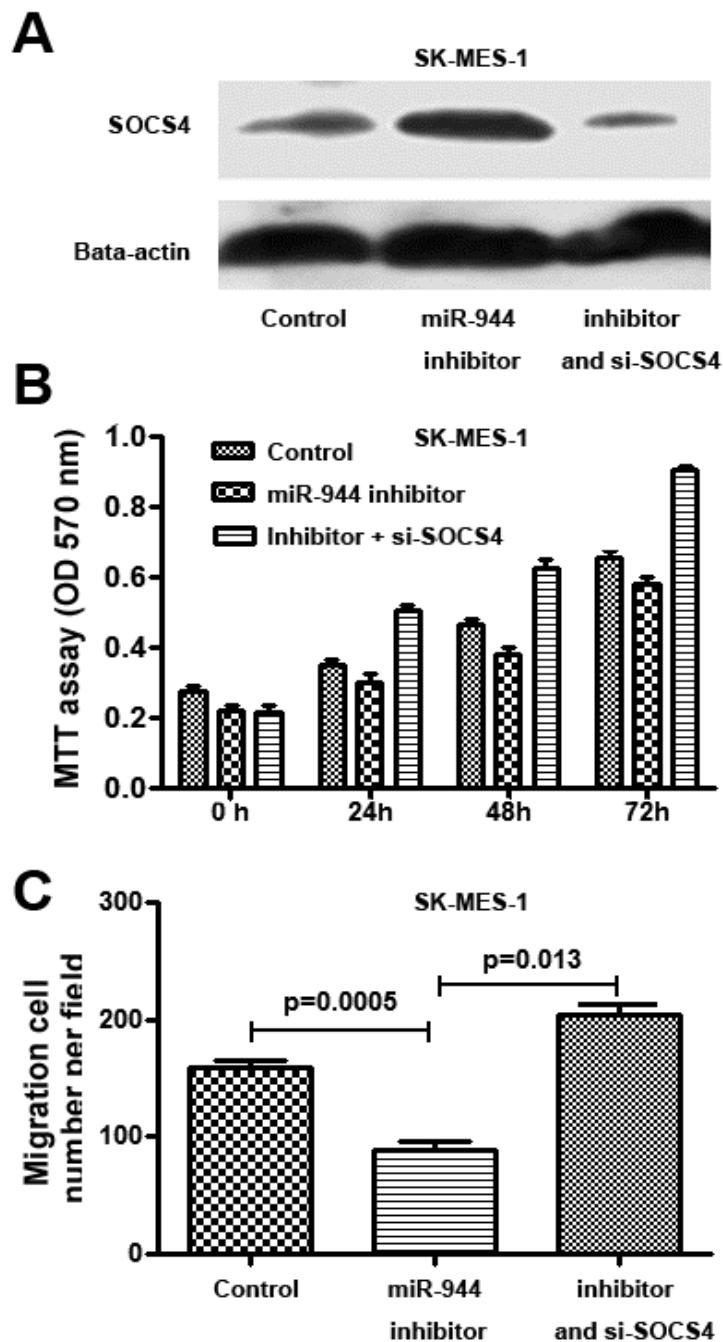

A, SK-MES-1 cells treated with both miR-944 inhibitor and si-SOCS4 exhibited a lower level of SOCS4 expression compared with cells treated with miR-944 inhibitor alone. B, SK-MES-1 cells treated with both miR-944 inhibitor and si-SOCS4 had a higher rate of cell growth compared with cells treated with miR-944 inhibitor. C, SK-MES-1 cells treated with both miR-944 inhibitor and si-SOCS4 had higher levels of migration and invasion compared with cells treated with miR-944 inhibitor.

**Supplementary Table 1.** Demographic and histopathological characteristics of 108 NSCLC patients

| Parameter               | Mean | %    |
|-------------------------|------|------|
| Age, years              | 68.3 |      |
| Gender                  |      |      |
| Men                     | 69   | 63.8 |
| Women                   | 39   | 36.2 |
| Race                    |      |      |
| White American          | 80   | 74   |
| African American        | 28   | 26   |
| Histology               |      |      |
| Squamous cell carcinoma | 54   | 50   |
| Adenocarcinoma          | 54   | 50   |
| Stage                   |      |      |
| I                       | 68   | 63   |
| II                      | 20   | 18.5 |
| III-IV                  | 20   | 18.5 |

Abbreviations: NSCLC, non-small cell lung cancer.

**Supplementary Table 2.** Demographic and clinical characteristics of 52 SCC patients and the association with miR-944 expression in tumor tissue specimens

| Characteristics | Number of cases | (%) | p      |       |
|-----------------|-----------------|-----|--------|-------|
| Gender          | Male            | 39  | 75.00% | 0.629 |
|                 | Female          | 13  | 25.00% |       |
| Age, year       | ≥60             | 38  | 73.08% | 0.183 |
|                 | <60             | 14  | 26.92% |       |
| T status        | 1               | 21  | 40.38% | 0.465 |
|                 | 2               | 25  | 48.08% |       |
|                 | 3               | 3   | 5.77%  |       |
|                 | 4               | 3   | 5.77%  |       |
| N status        | No              | 31  | 59.62% | 0.002 |
|                 | Yes             | 21  | 40.38% |       |
| Stage I         | I               | 28  | 53.85% | 0.036 |
|                 | II              | 8   | 15.38% |       |
|                 | III-IV          | 16  | 30.77% |       |



**Supplementary Table 5.** The AUCs of seven miRNAs displaying different expression between SCC and AC

| miRNAs      | P-value | AUC    | 95% confidence interval |
|-------------|---------|--------|-------------------------|
| miR-205-5p  | <0.001  | 0.9133 | 0.8386 to 0.9881        |
| miR-944     | <0.001  | 0.8967 | 0.8141 to 0.9793        |
| miR-183-3p  | <0.001  | 0.8931 | 0.7984 to 0.9878        |
| miR-205-3p  | <0.001  | 0.8931 | 0.7984 to 0.9878        |
| miR-135a-5p | <0.001  | 0.8744 | 0.7809 to 0.9680        |
| miR-147b    | <0.001  | 0.7943 | 0.6755 to 0.9130        |
| miR-577     | 0.001   | 0.76   | 0.6375 to 0.8825        |

Abbreviations: AUC, the area under receiver operating characteristic curve.

**Supplementary Table 6.** Kyoto Encyclopedia of Genes and Genomes

| pathway                                 | p-value     |
|-----------------------------------------|-------------|
| Pathways in cancer                      | 0.000250605 |
| Non-small cell lung cancer              | 0.000714102 |
| Glioma                                  | 0.000831501 |
| Melanoma                                | 0.001100426 |
| Chronic myeloid leukemia                | 0.001775331 |
| Focal adhesion                          | 0.01159417  |
| Prostate cancer                         | 0.01160361  |
| Transcriptional misregulation in cancer | 0.01187092  |
| Malaria                                 | 0.01187092  |
| Pancreatic cancer                       | 0.01187092  |
| HIF-1 signaling pathway                 | 0.01231473  |
| Viral carcinogenesis                    | 0.01808485  |
| Cell cycle                              | 0.01921407  |
| Wnt signaling pathway                   | 0.02074698  |
| Adherens junction                       | 0.02650581  |
| Bladder cancer                          | 0.02899416  |
| VEGF signaling pathway                  | 0.03304023  |
| p53 signaling pathway                   | 0.03304023  |
| B cell receptor signaling pathway       | 0.03969679  |
| Basal cell carcinoma                    | 0.0463021   |
